# Supplementary material
Source: HighWire-hosted journal article supplement (http://www.jneurosci.org/highwire/filestream/599972/field_highwire_adjunct_files/0/Supplemental_Material.pdf)
Supplement: Supplemental_Material.pdf [file Supplemental_Material.pdf]

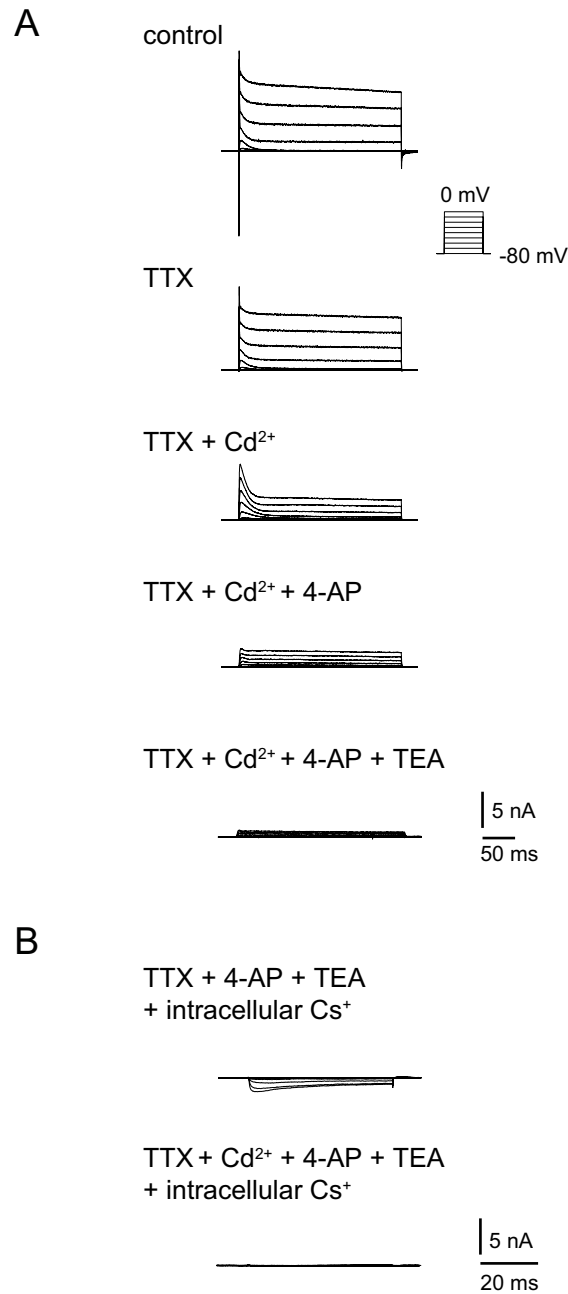

**Supplemental Figure 1.** Whole-cell recordings of voltage activated currents from uniglomerular projection neurons under different pharmacological conditions. Holding potential was -80 mV. Potential was stepped from -80 to 0 mV in 10 mV increments. **A**, Tetrodotoxin ( $10^{-7}$  -  $10^{-4}$  M, TTX) blocked transient, voltage gated Na<sup>+</sup> currents. Cd<sup>2+</sup> ( $5 \times 10^{-4}$  M) blocked Ca<sup>2+</sup> currents and accordingly Ca<sup>2+</sup> activated outward currents ( $I_{O(Ca)}$ ). 4-aminopyridine ( $4 \times 10^{-3}$  M, 4-AP) was used to block transient K<sup>+</sup> currents ( $I_A$ ) and tetraethylammonium ( $2 \times 10^{-2}$  M, TEA) blocked sustained K<sup>+</sup> currents ( $I_{K(V)}$ ) and  $I_{O(Ca)}$ . **B**, To eliminate residual K<sup>+</sup> currents K-aspartate was substituted with CsCl in the pipette solution.

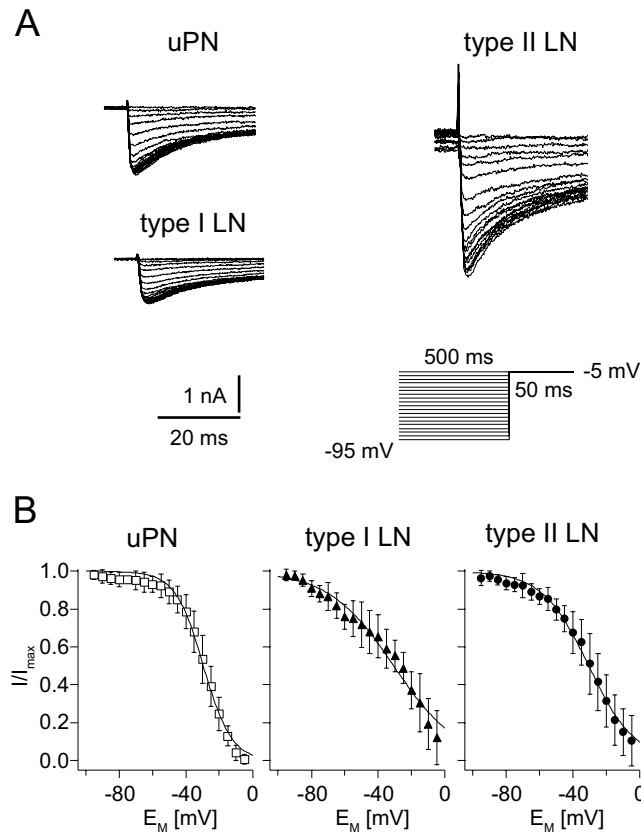

**Supplemental Figure 2.** Steady state inactivation of voltage activated  $Ca^{2+}$  currents ( $I_{Ca}$ ) in uPNs, type I LNs and type II LNs. **A**, Example current traces. Test pulses to -5 mV were preceded by 500 ms pulses ranging from -95 mV to -5 mV in 5 mV increments. **B**,  $I/I_{max}$  relations of steady state inactivation of peak  $I_{Ca}$  from uPNs, type I LNs and type II LNs. The curves are fits to first-order Boltzmann relations (equation 1) with the following parameters: uPN:  $V_{0.5inact} = -29.6 \pm 4.0$  mV;  $s_{inact} = 8.4 \pm 0.5$ ;  $n = 12$ . Type I LN:  $V_{0.5inact} = -30 \pm 7.4$  mV;  $s_{inact} = 18.3 \pm 1.5$ ;  $n = 10$ . Type II LN:  $V_{0.5inact} = -30 \pm 7.2$  mV;  $s_{inact} = 13.8 \pm 0.5$ ;  $n = 12$ .

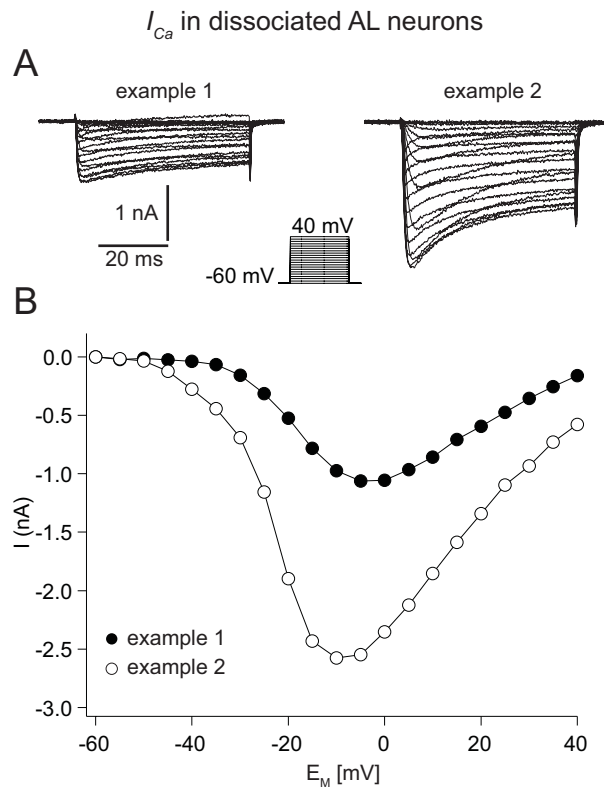

**Supplemental Figure 3.** Steady state activation of voltage activated  $Ca^{2+}$  currents in acutely dissociated antennal lobe neurons. **A**, Current traces for steady state activation of  $I_{Ca}$  from two neurons. Example 1 resembles the  $I_{Ca}$  of type I LNs. Example 2 resembles the  $I_{Ca}$  of type II LNs.  $I_{Ca}$  was evoked by 50 ms voltage steps from -60 mV to 40 mV in 5 mV increments. **B**,  $I/V$  relations of  $I_{Ca}$  recorded in example 1 and 2

|                                                            | uPN                            | type I LN                      | type II LN                     |
|------------------------------------------------------------|--------------------------------|--------------------------------|--------------------------------|
| $E_M$ (mV)                                                 | $-61.4 \pm 9.1$ •<br>$n = 14$  | $-53.0 \pm 7.4$ •<br>$n = 16$  | $-56.9 \pm 11.3$<br>$n = 24$   |
| $R_M$ (M $\Omega$ )                                        | $89.6 \pm 39.2$ •□<br>$n = 11$ | $50.6 \pm 22.3$ •+<br>$n = 13$ | $37.6 \pm 14.9$ □+<br>$n = 22$ |
| $C_M$ (pF)                                                 | $22.9 \pm 9.3$ •□<br>$n = 15$  | $36.8 \pm 16.3$ •+<br>$n = 19$ | $87.7 \pm 38.7$ □+<br>$n = 29$ |
| <i>I<sub>Ca</sub> tail current</i>                         |                                |                                |                                |
| $I_{Ca,tail_{max}}$ (nA)                                   | $2.1 \pm 0.6$ •□<br>$n = 12$   | $1.4 \pm 0.6$ •+<br>$n = 10$   | $3.3 \pm 1.2$ □+<br>$n = 12$   |
| * $I_{Ca,tail_{max}} A_M^{-1}$<br>(pA $\mu\text{m}^{-1}$ ) | $0.9 \pm 0.3$ •<br>$n = 12$    | $0.5 \pm 0.2$ □<br>$n = 10$    | $0.4 \pm 0.1$ •□<br>$n = 12$   |
| $G_{max}$ (nS)                                             | $16.1 \pm 4.7$ •□<br>$n = 12$  | $10.4 \pm 4.8$ •+<br>$n = 10$  | $21.9 \pm 7.7$ □+<br>$n = 12$  |
| * $G_{max} A_M^{-1}$<br>(nS $\mu\text{m}^{-1}$ )           | $6.6 \pm 2.5$ •<br>$n = 12$    | $3.5 \pm 1.7$ □<br>$n = 10$    | $2.4 \pm 0.7$ •□<br>$n = 12$   |
| $V_{0.5_{act}}$ (mV)                                       | $-10.6 \pm 3.4$ •<br>$n = 12$  | $-11.1 \pm 6.5$ □<br>$n = 10$  | $-19.4 \pm 4.7$ •□<br>$n = 12$ |
| $S_{act}$                                                  | $8.5 \pm 1.8$ •<br>$n = 12$    | $10.0 \pm 2.3$ □<br>$n = 10$   | $6.4 \pm 2.3$ •□<br>$n = 12$   |
| <i>I<sub>Ca</sub> peak current</i>                         |                                |                                |                                |
| $I_{Ca_{max}}$ (nA)                                        | $1.4 \pm 0.4$ •□<br>$n = 12$   | $1 \pm 0.3$ •+<br>$n = 10$     | $3 \pm 1$ □+<br>$n = 12$       |
| $E_M$ at $I_{Ca_{max}}$<br>(mV)                            | $5.8 \pm 4.9$ •<br>$n = 12$    | $9.0 \pm 6.1$ □<br>$n = 10$    | $-7.5 \pm 7.2$ •□<br>$n = 12$  |
| $V_{0.5_{inact}}$ (mV)                                     | $-29.6 \pm 4.0$<br>$n = 12$    | $-30 \pm 7.4$<br>$n = 10$      | $-30 \pm 7.2$<br>$n = 12$      |
| $S_{inact}$                                                | $8.4 \pm 0.5$ •□<br>$n = 12$   | $18.3 \pm 1.5$ •<br>$n = 10$   | $13.8 \pm 0.5$ □<br>$n = 12$   |

**Supplemental Table 1.** Electrophysiological parameters of uniglomerular projection neurons (uPNs), type I and type II local interneurons (LNs). Values labeled by the same symbol are significantly different from each other ( $P \leq 0.05$ ).

\* To calculate these values we used the values for whole-cell capacitance and -surface from measurements that were made with 'calcium' extra-/intracellular saline (see results: characteristics of  $I_{Ca}$ ).
